# Supplementary material for: Practice environment, psychological flexibility, and their association with career adaptability in junior nurses: A cross-sectional study
Source: Research Square preprint supplement (doi:10.21203/rs.3.rs-6352500/v1), 2025-05-30
Supplement: Supplementary file 1 [file bbaa6d6478087b2031dca649.docx]

**To investigate the general information in** **junior nurses**

**Dear nursing staff:**

Hello, first of all, I would like to express my heartfelt thanks to you for your daily hard work and contribution, and thank you for taking time out of your busy schedule to fill in this questionnaire. The questionnaire is a purely academic survey, and there is no right or wrong in the questions. In order to ensure the accuracy of the survey results, please fill in the following contents carefully, please do not miss any items. We promise that the data of this research is strictly confidential, only for this research, and will not have any influence or harm to you.

Participation in this survey is voluntary, thank you again for participating in this study!

1. **General Information questionnaire**
2. Age(years) ______
3. Sex □Male □Female
4. Educational □Junior college □Undergraduate □Postgraduate
5. Marital status □Single □Married □Other
6. Number of children □0 □≥1
7. Department □Geriatrics □Surgery □Gynecology and pediatrics □Emergency and ICU □Other
8. Employment status □Regular employee □Contract system □Labor dispatch
9. Work experience □1 year □2 years □3 years □4 years □5 years
10. Shift patterns □Day shift □Night shift □Alternate day and night □Random
11. Monthly night shift (times) □< 4 □4–8 □> 8
12. Weekly overtime hours □< 10 hours □10–15 hours □> 15 hours
13. Monthly income □≤ 5000 yuan □5001–9999 yuan □≥ 10000 yuan
